# Supplementary material for: A Visual and Comprehensive Review on COVID-19-Associated Pulmonary Aspergillosis (CAPA)
Source: MDPI journal article supplement (doi:10.3390/jof7121067), 2021-12-11
Supplement: s1 [file s1]

**Table S1. General information on observational studies and case series with 5 or more CAPA cases publicly available on October 12<sup>th</sup> 2021.**

| Study                     | Study design                              | Date publication | Country or countries                                                                     | Setting | Diagnostic criteria                        | Included patients (n) | Total proven CAPA (n) | Total probable or putative CAPA (n) | Total possible CAPA (n) | Total number of patients with colonization (n) | Percentage proven, probable or putative CAPA among all included patients |
|---------------------------|-------------------------------------------|------------------|------------------------------------------------------------------------------------------|---------|--------------------------------------------|-----------------------|-----------------------|-------------------------------------|-------------------------|------------------------------------------------|--------------------------------------------------------------------------|
| Gangneux et al [1]        | Prospective observational                 | Preprint         | France                                                                                   | ICU     | ECMM/ISHAM allowing TA, AspICU             | 509                   |                       | 76                                  | 24                      |                                                | 19.6%                                                                    |
| Hatzl et al [2]           | Prospective interventional                | 15-09-2021       | Austria                                                                                  | ICU     | ECMM/ISHAM                                 | 57 <sup>1</sup>       |                       | 8                                   | 1                       |                                                | 14.0%                                                                    |
| Janssen et al [3]         | Prospective / retrospective observational | 14-09-2021       | Belgium, The Netherlands, France                                                         | ICU     | ECMM/ISHAM                                 | 823                   | 6                     | 53                                  | 4                       |                                                | 7.2%                                                                     |
| Ergün et al [4]           | Prospective observational                 | 8-09-2021        | The Netherlands, Belgium, France, United Kingdom                                         | ICU     | ECMM/ISHAM                                 | 219                   | 1                     | 38                                  | 19                      | 21                                             | 17.8%                                                                    |
| Prattes et al [5]         | Prospective observational                 | 26-08-2021       | Austria, Belgium, France, Germany, Italy, Pakistan, Spain, United Kingdom, United States | ICU     | ECMM/ISHAM                                 | 592                   | 11                    | 80                                  | 18                      |                                                | 15.4%                                                                    |
| Van Ackerbroeck et al [6] | Retrospective observational               | 19-08-2021       | Belgium                                                                                  | ICU     | ECMM/ISHAM                                 | 18 <sup>1</sup>       |                       | 11                                  |                         |                                                | 61.1%                                                                    |
| Szabo et al [7]           | Retrospective observational case series   | 14-08-2021       | Hungary                                                                                  | ICU     | EORTC/MSGERC, ECMM/ISHAM & modified AspICU | 90                    |                       | 16                                  |                         |                                                | 17.8%                                                                    |
| Iqbal et al [8]           | Prospective observational                 | 7-08-2021        | Pakistan                                                                                 | ICU     | ECMM/ISHAM allowing TA culture             | 307                   |                       | 61                                  |                         |                                                | 19.9%                                                                    |
| Paramythiotou et al [9]   | Retrospective observational               | 14-07-2021       | Greece                                                                                   | ICU     | ECMM/ISHAM                                 | 179                   |                       | 4                                   | 2                       |                                                | 2.2%                                                                     |

|                          |                                            |            |                 |                  |                                                   |                  |   |    |    |    |       |
|--------------------------|--------------------------------------------|------------|-----------------|------------------|---------------------------------------------------|------------------|---|----|----|----|-------|
| Vélez et al [10]         | Retrospective observational                | 14-07-2021 | Mexico          | ICU              | ECMM/ISHAM                                        | 83               | 2 | 14 |    |    | 19.3% |
| Fortarezza et al [11]    | Prospective observational, autopsies       | 4-07-2021  | Italy           | HOS              | ECMM/ISHAM                                        | 45               | 9 |    |    |    | 20.0% |
| Kula et al [12]          | Systematic review, autopsies               | 23-06-2021 | Worldwide       | ICU              | EORTC/MSGERC                                      | 677              | 8 |    |    |    | 1.2%  |
| Wasylyshyn et al [13]    | Retrospective observational                | 18-06-2021 | USA             | ICU              | EORTC/MSGERC, ECMM/ISHAM                          | 256              |   | 2  | 1  |    | 0.8%  |
| Ghazanfari et al [14]    | Prospective observational                  | 14-06-2021 | Iran            | ICU              | EORTC/MSGERC, AspiCU, ECMM/ISHAM                  | 105 <sup>2</sup> |   | 22 |    |    | 21.0% |
| Oliva et al [15]         | Retrospective observational                | 26-05-2021 | Italy           | ICU              | Modified AspiCU                                   | 55               |   | 2  |    |    | 3.6%  |
| Reizine et al [16]       | Retrospective observational                | 15-05-2021 | France          | ICU              | AspiCU, IAPA expert and EORTC/MSGERC allowing NBL | 49               |   | 4  | 6  |    | 8.2%  |
| Martín et al [17]        | Retrospective observational                | 20-04-2021 | Spain           | ICU              | AspiCU                                            | 15               |   | 3  |    |    | 20.0% |
| Ripa et al [18]          | Prospective observational                  | 27-03-2021 | Italy           | ICU <sup>3</sup> | AspiCU allowing BAL GM                            | 86 <sup>3</sup>  |   | 10 |    |    | 11.6% |
| Lahmer et al [19]        | Prospective observational                  | 17-03-2021 | Germany         | ICU              | Modified AspiCU allowing NBL                      | 32               |   | 11 |    | 3  | 34.4% |
| Permpalung et al [20]    | Retrospective observational                | 9-03-2021  | USA             | ICU              | own expanded CAPA definitions                     | 396              |   | 20 | 19 |    | 5.1%  |
| Van Grootveld et al [21] | Prospective observational                  | 5-03-2021  | The Netherlands | ICU              | ECMM/ISHAM                                        | 63               |   | 11 |    | 2  | 17.5% |
| Yusuf et al [22]         | Case-control / retrospective observational | 18-02-2021 | The Netherlands | ICU              | No criteria used                                  | 92               |   |    |    |    | 0.0%  |
| Versyck et al [23]       | Retrospective observational                | 16-02-2021 | France          | ICU              | Modified AspiCU                                   | 54               |   | 2  |    |    | 3.7%  |
| Meijer et al [24]        | Prospective case series / observational    | 16-02-2021 | The Netherlands | ICU              | ECMM/ISHAM                                        | 66               |   | 8  | 5  |    | 12.1% |
| Fekkar et al [25]        | Retrospective observational                | 1-02-2021  | France          | ICU              | EORTC/MSGERC or own criteria (putative)           | 145              |   | 6  |    | 25 | 4.1%  |
| Maes et al [26]          | Retrospective observational                | 11-01-2021 | United Kingdom  | ICU              | Modified AspiCU                                   | 81               |   | 3  |    |    | 3.7%  |

|                            |                             |            |                 |     |                                                                |                  |   |                 |  |   |        |
|----------------------------|-----------------------------|------------|-----------------|-----|----------------------------------------------------------------|------------------|---|-----------------|--|---|--------|
| Marr et al [27]            | Retrospective case series   | 1-01-2021  | USA, Spain      | HOS | Own criteria                                                   | 20               |   | 20              |  |   | 100.0% |
| Razazi et al [28]          | Retrospective observational | 18-12-2020 | France          | ICU | AspICU, IAPA expert and modified AspICU                        | 90               |   | 13              |  | 4 | 14.4%  |
| Dellièvre et al [29]       | Retrospective observational | 13-12-2020 | France          | ICU | EORTC/MSGERC, IAPA expert                                      | 366              |   | 21              |  |   | 5.7%   |
| Benedetti et al [30]       | Retrospective case series   | 7-12-2020  | Argentina       | ICU | AspICU, IAPA and EORTC/MSGERC                                  | 5                |   | 5               |  |   | 100.0% |
| Nebreda-Mayoral et al [31] | Retrospective observational | 3-12-2020  | Spain           | HOS | Criteria by Armstrong-James et al                              | 113              |   | 3               |  |   | 2.7%   |
| Segrelles-Calvo et al [32] | Prospective observational   | 3-12-2020  | Spain           | ICU | EORTC/MSGERC                                                   | 215              |   | 7               |  |   | 3.3%   |
| Machado et al [33]         | Prospective observational   | 29-11-2020 | Spain           | ICU | Modified AspICU, EORTC/MSGERC                                  | 239              |   | 8               |  | 9 | 3.3%   |
| Mitaka et al [34]          | Retrospective case series   | 1-10-2020  | USA             | ICU | AspICU                                                         | 7                |   | 4               |  | 3 | 57.1%  |
| White et al [35]           | Prospective observational   | 29-09-2020 | United Kingdom  | ICU | AspICU, modified AspICU and own CAPA definitions, allowing NBL | 135              |   | 20 <sup>6</sup> |  |   | 14.8%  |
| Dupont et al [36]          | Prospective observational   | 10-09-2020 | France          | ICU | AspICU                                                         | 106              |   | 19              |  |   | 17.9%  |
| Sarrazyn et al [37]        | Retrospective observational | 9-09-2020  | Belgium         | HOS | Criteria by Alanio et al                                       | 131 <sup>7</sup> |   | 4               |  |   | 3.1%   |
| Falces-Romero et al [38]   | Retrospective case series   | 4-08-2020  | Spain           | HOS | AspICU, EORTC/MSGERC                                           | 10               |   | 8               |  | 2 | 80.0%  |
| Bartoletti et al [39]      | Prospective observational   | 28-07-2020 | Italy           | ICU | IAPA criteria                                                  | 108 <sup>8</sup> | 2 | 28              |  | 1 | 27.8%  |
| Nasir et al [40]           | Retrospective observational | 18-07-2020 | Pakistan        | ICU | Authors own criteria                                           | 23               |   | 5               |  | 4 | 21.7%  |
| Van Biesen, et al [41]     | Prospective observational   | 15-07-2020 | The Netherlands | ICU | AspICU without host factor, allowing NBL GM                    | 42               |   | 9               |  | 1 | 21.4%  |
| Gangneux et al [42]        | Prospective observational   | 10-07-2020 | France          | ICU | AspICU, authors own modified AspICU                            | 45               |   | 9               |  |   | 20.0%  |
| Lamoth et al [43]          | Retrospective observational | 10-07-2020 | Switzerland     | ICU | IAPA criteria allowing consecutive bronchial aspirates         | 118              |   | 3               |  |   | 2.5%   |

|                                                                                                   |                                           |            |                 |                  |                                                   |                 |           |            |            |           |              |
|---------------------------------------------------------------------------------------------------|-------------------------------------------|------------|-----------------|------------------|---------------------------------------------------|-----------------|-----------|------------|------------|-----------|--------------|
| Van Arkel et al [44]                                                                              | Retrospective observational               | 1-07-2020  | The Netherlands | ICU              | IAPA criteria, EORTC/MSGERC                       | 31              |           | 3          | 3          |           | 9.7%         |
| Wang et al [45]                                                                                   | Retrospective case series / observational | 5-06-2020  | China           | ICU <sup>1</sup> | EORTC/MSGERC                                      | 26 <sup>1</sup> |           | 8          |            |           | 30.8%        |
| Rutsaert et al [46]                                                                               | Retrospective case series / observational | 1-06-2020  | Belgium         | ICU              | AspICU, EORTC/MSGERC                              | 34              | 4         |            |            |           | 11.8%        |
| Alanio et al [47]                                                                                 | Prospective observational                 | 20-05-2020 | France          | ICU              | EORTC/MSGERC, extended version of modified AspICU | 27              |           | 8          |            |           | 29.6%        |
| Koehler et al [48]                                                                                | Retrospective chart review                | 15-04-2020 | Germany         | ICU              | Extended modified AspICU, EORTC/MSGERC            | 19              |           | 5          |            |           | 26.3%        |
|                                                                                                   |                                           |            |                 |                  |                                                   |                 |           |            |            |           |              |
| <b>Observational studies (n=42)</b>                                                               |                                           |            |                 |                  |                                                   | <b>6193</b>     | <b>35</b> | <b>638</b> | <b>102</b> | <b>70</b> | <b>10.9%</b> |
| <b>ICU-only observational studies (n=39)</b>                                                      |                                           |            |                 |                  |                                                   | <b>5904</b>     | <b>26</b> | <b>631</b> | <b>102</b> | <b>70</b> | <b>11.1%</b> |
| <b>ICU-only retrospective (or partially prospective) observational studies<sup>9</sup> (n=21)</b> |                                           |            |                 |                  |                                                   | <b>2951</b>     | <b>12</b> | <b>198</b> | <b>35</b>  | <b>33</b> | <b>7.1%</b>  |
| <b>ICU-only prospective observational studies<sup>9</sup> (n=18)</b>                              |                                           |            |                 |                  |                                                   | <b>2953</b>     | <b>14</b> | <b>433</b> | <b>67</b>  | <b>37</b> | <b>15.1%</b> |

Abbreviations: CAPA: COVID-19-associated pulmonary aspergillosis; ECMM/ISHAM: European Confederation of Medical Mycology, International Society for Human & Animal Mycology; EORTC/MSGERC: European Organisation for Research and Treatment of Cancer Studies and Mycosis Study Group Education and Research Consortium; GM: galactomannan; IAPA: influenza-associated pulmonary aspergillosis; NBL: non-bronchoscopic lavage; TA: tracheal aspirate

Remarks: Case series that mentioned observational data were counted as observational studies.

<sup>1</sup>Hatzl et al, Van Ackerbroeck and Wang et al et al: only patients who did not receive prophylaxis are included in this table. <sup>2</sup>Ghazanfari et al: only patients with mechanical ventilation for 4 days or longer were included. <sup>3</sup>Ripa et al: only ICU-admitted patients are mentioned in this table. <sup>4</sup>Yusuf et al: no CAPA diagnosis was given, but 10 of 92 ICU COVID-19 patients had positive tests for *Aspergillus* on lower respiratory tract samples. <sup>5</sup>Dellièvre et al: probable CAPA was diagnosed in 108 patients (19.4%) who underwent respiratory sampling for deterioration. <sup>6</sup>White et al: 20 proven/putative CAPA patients is the number according to the IAPA criteria. <sup>7</sup>Sarrazyn et al: unclear how many of the included patients were ICU-admitted patients. <sup>8</sup>Bartoletti et al: total ICU population was 185, only the 108 patients with screening for aspergillosis were included in this study. <sup>9</sup>The partially prospective, partially retrospective trial by Janssen et al is counted as a retrospective study.

**Table S2. Mortality numbers among CAPA and non-CAPA patients in non-autopsy observational trials in which this data is available.**

| Study                      | Mortality endpoint (days or ICU discharge) | Total number of included patients (n) | CAPA patients (proven, probable, putative, possible) (n) | Number of CAPA patients that died (proven, probable, putative, possible), all-cause mortality (n) | Percentage of CAPA patients that died | Total number of patients without arguments for CAPA* | Total number of patients without arguments for CAPA that died* | Percentage of patients without arguments for CAPA that died* |
|----------------------------|--------------------------------------------|---------------------------------------|----------------------------------------------------------|---------------------------------------------------------------------------------------------------|---------------------------------------|------------------------------------------------------|----------------------------------------------------------------|--------------------------------------------------------------|
| Gangneux et al [1]         | ICU discharge                              | 509                                   | 100                                                      | 58                                                                                                | 58.0%                                 | 409                                                  | 128                                                            | 31.3%                                                        |
| Hatzl et al [2]            | 30                                         | 57 <sup>1</sup>                       | 9                                                        | 3                                                                                                 | 33.3%                                 | 48                                                   |                                                                |                                                              |
| Janssen et al [3]          | ICU discharge                              | 823 <sup>2</sup>                      | 63                                                       | 31                                                                                                | 49.2%                                 | 753                                                  | 192                                                            | 25.5%                                                        |
| Ergün et al [4]            | 30                                         | 219                                   | 58                                                       | 29                                                                                                | 50.0%                                 | 133                                                  | 32                                                             | 24.1%                                                        |
| Prattes et al [5]          | 84                                         | 592                                   | 109                                                      | 61                                                                                                | 56.0%                                 | 483                                                  | 198                                                            | 41.0%                                                        |
| Iqbal et al [8]            | ICU discharge                              | 307                                   | 61                                                       | 56                                                                                                | 91.8%                                 | 246                                                  |                                                                |                                                              |
| Paramythiotou et al [9]    | ICU discharge                              | 179                                   | 6                                                        | 4                                                                                                 | 66.7%                                 | 173                                                  |                                                                |                                                              |
| Vélez et al [10]           | 60                                         | 83                                    | 16                                                       | 5                                                                                                 | 31.3%                                 | 67                                                   | 9                                                              | 13.4%                                                        |
| Wasylyshyn et al [13]      | 84                                         | 256                                   | 3                                                        | 1                                                                                                 | 33.3%                                 | 253                                                  | 61                                                             | 24.1%                                                        |
| Ghazanfari et al [14]      | ICU discharge                              | 105 <sup>3</sup>                      | 22                                                       | 20                                                                                                | 90.9%                                 | 65                                                   | 65                                                             | 100%                                                         |
| Oliva et al [15]           | 30                                         | 55                                    | 2                                                        | 0                                                                                                 | 0.0%                                  | 53                                                   | 38                                                             | 71.7%                                                        |
| Reizine et al [16]         | 90                                         | 49                                    | 10                                                       | 3                                                                                                 | 30.0%                                 | 39                                                   | 8                                                              | 20.5%                                                        |
| Martín et al [17]          | ICU discharge                              | 15                                    | 3                                                        | 1                                                                                                 | 33.3%                                 | 12                                                   | 2                                                              | 16.7%                                                        |
| Lahmer et al [19]          | ICU discharge                              | 32                                    | 11                                                       | 4                                                                                                 | 36.4%                                 | 21                                                   | 2                                                              | 9.5%                                                         |
| Permpalung et al [20]      | ICU discharge                              | 396                                   | 39                                                       | 22                                                                                                | 56.4%                                 | 357                                                  | 144                                                            | 40.3%                                                        |
| Van Grootveld et al [21]   | ICU discharge                              | 63                                    | 11                                                       | 7                                                                                                 | 63.6%                                 | 44                                                   | 9                                                              | 20.5%                                                        |
| Versyck et al [23]         | ICU discharge                              | 54                                    | 2                                                        | 2                                                                                                 | 100.0%                                | 52                                                   |                                                                |                                                              |
| Meijer et al [24]          | ICU discharge                              | 66                                    | 13                                                       | 6                                                                                                 | 46.2%                                 | 53                                                   |                                                                |                                                              |
| Fekkar et al [25]          | 30                                         | 145                                   | 6                                                        | 4                                                                                                 | 66.7%                                 | 106                                                  |                                                                |                                                              |
| Maes et al [26]            | ICU discharge                              | 81                                    | 3                                                        | 1                                                                                                 | 33.3%                                 | 78                                                   | 30                                                             | 38.5%                                                        |
| Marr et al [27]            | Not mentioned                              | 20                                    | 20                                                       | 4                                                                                                 | 20.0%                                 |                                                      |                                                                |                                                              |
| Dellièvre et al [29]       | Not mentioned                              | 366                                   | 21                                                       | 15                                                                                                | 71.4%                                 |                                                      |                                                                |                                                              |
| Nebreda-Mayoral et al [31] | ICU discharge                              | 113                                   | 3                                                        | 2                                                                                                 | 66.7%                                 |                                                      |                                                                |                                                              |

|                            |               |                  |                   |                   |                       |                     |              |               |
|----------------------------|---------------|------------------|-------------------|-------------------|-----------------------|---------------------|--------------|---------------|
| Segrelles-Calvo et al [32] | ICU discharge | 215              | 7                 | 6                 | 85.7%                 | 208                 | 77           | 37.0%         |
| Machado et al [33]         | ICU discharge | 239              | 8                 | 8                 | 100%                  | 222                 |              |               |
| White et al [35]           | 30            | 135              | 20 <sup>4</sup>   | 5                 | 25.0%                 | 84                  |              |               |
| Dupont et al [36]          | 42            | 106              | 19                | 7                 | 36.8%                 | 87                  |              |               |
| Sarrazyn et al [37]        | ICU discharge | 131              | 4                 | 4                 | 100%                  | 127                 |              |               |
| Bartoletti et al [39]      | ICU discharge | 108 <sup>5</sup> | 30                | 13                | 43.3%                 | 73                  |              |               |
| Nasir et al [40]           | 35            | 23               | 5                 | 3                 | 60.0%                 | 14                  |              |               |
| Van Biesen, et al [41]     | ICU discharge | 42               | 9                 | 2                 | 22.2%                 | 32                  |              |               |
| Gangneux et al [42]        | ICU discharge | 45               | 9                 | 2                 | 22.2%                 | 30                  | 4            | 13.3%         |
| Lamoth et al [43]          | ICU discharge | 118              | 3                 | 1                 | 33.3%                 | 115                 |              |               |
| Van Arkel et al [44]       | ICU discharge | 31               | 6                 | 4                 | 66.7%                 | 25                  | 8            | 32.0%         |
| Rutsaert et al [46]        | ICU discharge | 34               | 4                 | 1                 | 25.0%                 | 27                  |              |               |
| Alanio et al [47]          | ICU discharge | 27               | 8                 | 4                 | 50.0%                 | 18                  | 7            | 38.9%         |
| Koehler et al [48]         | ICU discharge | 19               | 5                 | 3                 | 60.0%                 | 14                  |              |               |
|                            |               |                  |                   |                   |                       |                     |              |               |
| <b>Total</b>               |               | <b>5620</b>      | <b>728 / 539*</b> | <b>402 / 249*</b> | <b>55.2% / 46.2%*</b> | <b>4521 / 3237*</b> | <b>1014*</b> | <b>31.3%*</b> |

Remarks: Case series that mentioned observational data were counted as observational studies. \*Numbers for studies that provide clear data on the mortality in patients that did not have arguments for aspergillosis (including no patients explicitly categorized as colonized with *Aspergillus*). <sup>1</sup>Hatzl et al: only patients who did not receive prophylaxis are included in this table. <sup>2</sup>Janssen et al: only mortality data for 817 patients available. <sup>3</sup>Ghazanfari et al: only patients with mechanical ventilation for 4 days or longer were included. <sup>4</sup>White et al: 20 proven/putative CAPA patients is the number according to the IAPA criteria. <sup>5</sup>Bartoletti et al: total ICU population was 185, only the 108 patients with screening for aspergillosis were included in this study.

**Table S3. Data on *Aspergillus* culture and galactomannan.**

| Study                     | Total number included patients (n) | Number proven, probable or putative CAPA among all included patients | Total number of proven, probable, putative or possible CAPA patients (n) | Total number of patients with serum GM (n) | Total number of patients with positive serum GM (n) | Total number of patients with BAL/NBL GM (n) | Total number of patients with positive BAL/NBL GM (n) | Total number of patients with BAL/NBL culture (n) | Total number of patients with positive BAL/NBL culture (n) | Total number of patients with TA culture (n) | Total number of patients with positive TA culture (n) |
|---------------------------|------------------------------------|----------------------------------------------------------------------|--------------------------------------------------------------------------|--------------------------------------------|-----------------------------------------------------|----------------------------------------------|-------------------------------------------------------|---------------------------------------------------|------------------------------------------------------------|----------------------------------------------|-------------------------------------------------------|
| Gangneux et al [1]        | 509                                | 76                                                                   | 100                                                                      |                                            |                                                     |                                              |                                                       |                                                   |                                                            |                                              |                                                       |
| Hatzl et al [2]           | 57 <sup>1</sup>                    | 8                                                                    | 9                                                                        |                                            | 4                                                   |                                              | 7                                                     |                                                   | 4                                                          |                                              |                                                       |
| Janssen et al [3]         | 823                                | 59                                                                   | 63                                                                       | 349                                        | 7                                                   | 213                                          | 45                                                    | 301                                               | 28                                                         |                                              |                                                       |
| Ergün et al [4]           | 219                                | 39                                                                   | 58                                                                       | 188                                        | 8                                                   | 71                                           | 22                                                    | 77                                                | 17                                                         |                                              |                                                       |
| Prattes et al [5]         | 592                                | 91                                                                   | 109                                                                      |                                            |                                                     |                                              |                                                       |                                                   |                                                            |                                              |                                                       |
| Van Ackerbroeck et al [6] | 18 <sup>1</sup>                    | 11                                                                   | 11                                                                       |                                            |                                                     |                                              |                                                       |                                                   |                                                            |                                              |                                                       |
| Szabo et al [7]           | 90                                 | 16                                                                   | 16                                                                       |                                            |                                                     |                                              |                                                       |                                                   |                                                            |                                              |                                                       |
| Iqbal et al [8]           | 307                                | 61                                                                   | 61                                                                       |                                            |                                                     |                                              |                                                       |                                                   |                                                            |                                              | 61                                                    |
| Paramythiotou et al [9]   | 179                                | 4                                                                    | 6                                                                        |                                            | 4                                                   |                                              |                                                       |                                                   |                                                            | 6                                            | 5                                                     |
| Vélez et al [10]          | 83                                 | 16                                                                   | 16                                                                       |                                            | 5                                                   | At least 35                                  | 7                                                     |                                                   | 2                                                          |                                              |                                                       |
| Fortarezza et al [11]     | 45                                 | 9                                                                    | 9                                                                        |                                            |                                                     |                                              |                                                       |                                                   |                                                            |                                              |                                                       |
| Kula et al [12]           | 677                                | 8                                                                    | 8                                                                        |                                            |                                                     |                                              |                                                       |                                                   |                                                            |                                              |                                                       |
| Wasylyshyn et al [13]     | 256                                | 2                                                                    | 3                                                                        |                                            | 1                                                   |                                              | 1                                                     |                                                   |                                                            | 3                                            | 2                                                     |
| Ghazanfari et al [14]     | 105 <sup>2</sup>                   | 22                                                                   | 22                                                                       | 101                                        | 5                                                   | 105                                          | 16                                                    |                                                   |                                                            |                                              |                                                       |
| Oliva et al [15]          | 55                                 | 2                                                                    | 2                                                                        |                                            |                                                     | 39                                           | 2                                                     | 55                                                | 0                                                          |                                              |                                                       |
| Reizine et al [16]        | 49                                 | 4                                                                    | 10                                                                       |                                            | 3                                                   |                                              |                                                       |                                                   | 9                                                          |                                              |                                                       |
| Martín et al [17]         | 15                                 | 3                                                                    | 3                                                                        |                                            |                                                     |                                              | 3                                                     | 4                                                 | 3                                                          |                                              |                                                       |
| Ripa et al [18]           | 86 <sup>3</sup>                    | 10                                                                   | 10                                                                       |                                            |                                                     |                                              |                                                       |                                                   |                                                            |                                              |                                                       |
| Lahmer et al [19]         | 32                                 | 11                                                                   | 11                                                                       | 32                                         | 4                                                   | 32                                           | 11                                                    |                                                   | 9                                                          |                                              |                                                       |
| Permpalung et al [20]     | 396                                | 20                                                                   | 39                                                                       |                                            | 8                                                   |                                              | 2                                                     |                                                   | 2                                                          |                                              |                                                       |
| Van Grootveld et al [21]  | 63                                 | 11                                                                   | 11                                                                       |                                            |                                                     |                                              | 9                                                     |                                                   | 3                                                          |                                              |                                                       |

|                            |                  |                 |                 |     |   |     |    |                     |    |                    |    |
|----------------------------|------------------|-----------------|-----------------|-----|---|-----|----|---------------------|----|--------------------|----|
| Yusuf et al [22]           | 92               | 0 <sup>4</sup>  | 0 <sup>4</sup>  |     |   | 20  | 3  | 24                  | 2  |                    |    |
| Versyck et al [23]         | 54               | 2               | 2               | 54  | 2 |     | 1  |                     | 1  | 54                 | 2  |
| Meijer et al [24]          | 66               | 8               | 13              |     | 0 |     | 2  |                     | 8  |                    | 5  |
| Fekkar et al [25]          | 145              | 6               | 6               | 145 | 1 | /   | 4  | 347 BAL sent to lab | 3  | 120 TA sent to lab | 2  |
| Maes et al [26]            | 81               | 3               | 3               |     |   |     | 2  |                     |    |                    |    |
| Marr et al [27]            | 20               | 20              | 20              |     |   | 16  | 4  |                     | 3  |                    | 14 |
| Razazi et al [28]          | 90               | 13              | 13              | 88  | 5 | 0   | 0  | 24                  | 4  |                    |    |
| Dellière et al [29]        | 366              | 21              | 21              |     |   |     |    |                     |    |                    |    |
| Benedetti et al [30]       | 5                | 5               | 5               | 5   | 5 |     |    |                     |    | 5                  | 3  |
| Nebreda-Mayoral et al [31] | 113              | 3               | 3               |     |   |     |    |                     | 3  |                    |    |
| Segrelles-Calvo et al [32] | 215              | 7               | 7               |     |   |     |    |                     | 6  |                    | 2  |
| Machado et al [33]         | 239              | 8               | 8               |     | 4 |     |    |                     | 7  |                    | 1  |
| Mitaka et al [34]          | 7                | 4               | 4               |     | 1 |     |    | 4                   | 4  |                    |    |
| White et al [35]           | 135              | 20 <sup>5</sup> | 20 <sup>5</sup> |     | 2 | 135 | 17 |                     | 8  |                    |    |
| Dupont et al [36]          | 106              | 19              | 19              |     | 1 |     | 6  |                     | 13 |                    | 2  |
| Sarrazyn et al [37]        | 131              | 4               | 4               |     |   |     |    |                     |    |                    | 4  |
| Falces-Romero et al [38]   | 10               | 8               | 8               | 2   | 1 | 2   | 2  | 1                   | 1  | 8                  | 8  |
| Bartoletti et al [39]      | 108 <sup>6</sup> | 30              | 30              | 59  | 1 | 108 | 30 | 189 BAL sent to lab | 19 |                    |    |
| Nasir et al [40]           | 23               | 5               | 5               | 23  | 0 |     |    |                     |    |                    |    |
| Van Biesen, et al [41]     | 42               | 9               | 9               |     |   | 42  | 9  | 42                  | 7  |                    |    |
| Gangneux et al [42]        | 45               | 9               | 9               | 32  | 3 |     |    | 45                  | 9  |                    |    |
| Lamoth et al [43]          | 118              | 3               | 3               | 118 | 1 |     |    |                     |    | 80                 | 3  |
| Van Arkel et al [44]       | 31               | 3               | 6               | 3   | 0 |     | 3  |                     | 2  |                    | 2  |
| Wang et al [45]            | 26 <sup>1</sup>  | 8               | 8               |     |   |     |    |                     |    |                    |    |
| Rutsaert et al [46]        | 34               | 4               | 4               |     | 1 |     | 6  |                     |    |                    | 1  |
| Alanio et al [47]          | 27               | 8               | 8               |     | 1 |     | 2  | 20                  | 7  | 7                  | 2  |
| Koehler et al [48]         | 19               | 5               | 5               |     | 2 |     | 3  |                     | 1  |                    | 2  |



Abbreviations: BAL: bronchoalveolar lavage fluid; CAPA: COVID-19-associated pulmonary aspergillosis; GM: galactomannan; IAPA: influenza-associated pulmonary aspergillosis; NBL: non-bronchoscopic lavage fluid; TA: tracheal aspirate

Remarks: If information was not found, cell is left open. <sup>1</sup>Hatzl et al, Van Ackerbroeck et al and Wang et al: only patients who did not receive prophylaxis are included in this table. <sup>2</sup>Ghazanfari et al: only patients with mechanical ventilation for 4 days or longer were included. <sup>3</sup>Ripa et al: only ICU-admitted patients are mentioned in this table. <sup>4</sup>Yusuf et al: no CAPA diagnosis was given, but 10 of 92 ICU COVID-19 patients had positive tests for *Aspergillus* on lower respiratory tract samples. <sup>5</sup>White et al: 20 proven/putative CAPA patients is the number according to the IAPA criteria. <sup>6</sup>Bartoletti et al: total ICU population was 185, only the 108 patients with screening for aspergillosis were included in this study.

**Table S4. Cultured *Aspergillus* species and antifungal treatment.**

| Study                     | Total number included patients (n) | Number proven, probable or putative CAPA among all included patients | Total number of proven, probable, putative, possible CAPA patients (n) | <i>Aspergillus</i> species                                                                                                                                                                                | Antifungal therapy given to the CAPA cases                                                                                                                                                   |
|---------------------------|------------------------------------|----------------------------------------------------------------------|------------------------------------------------------------------------|-----------------------------------------------------------------------------------------------------------------------------------------------------------------------------------------------------------|----------------------------------------------------------------------------------------------------------------------------------------------------------------------------------------------|
| Gangneux et al [1]        | 509                                | 76                                                                   | 100                                                                    |                                                                                                                                                                                                           | 44 patients VRC, 20 patients L-AMB, 16 patients caspofungin, 11 patients ISV and 3 patients other antifungal drugs                                                                           |
| Hatzl et al [2]           | 57 <sup>1</sup>                    | 8                                                                    | 9                                                                      |                                                                                                                                                                                                           | 3 patients ISV, 6 POS, 1 POS then ISV                                                                                                                                                        |
| Janssen et al [3]         | 823                                | 59                                                                   | 63                                                                     | <i>A. fumigatus</i> in the majority of patients                                                                                                                                                           | Discovery cohort: 20 patients VRC, 13 patients azole + echinocandin combination therapy, 2 patients other azole monotherapy, 1 patient echinocandin monotherapy, 1 patient L-AMB monotherapy |
| Ergün et al [4]           | 219                                | 39                                                                   | 58                                                                     |                                                                                                                                                                                                           | 19 patients VRC, 28 patients VRC/Anidulafungin, 9 patients L-AMB, 2 patients Caspofungin, 1 patient VRC/Caspofungin, 1 patient VRC/L-AMB                                                     |
| Prattes et al [5]         | 592                                | 91                                                                   | 109                                                                    |                                                                                                                                                                                                           |                                                                                                                                                                                              |
| Van Ackerbroeck et al [6] | 18                                 | 11                                                                   | 11                                                                     |                                                                                                                                                                                                           |                                                                                                                                                                                              |
| Szabo et al [7]           | 90                                 | 16                                                                   | 16                                                                     | <i>A.fumigatus</i> in all patients                                                                                                                                                                        |                                                                                                                                                                                              |
| Iqbal et al [8]           | 307                                | 61                                                                   | 61                                                                     | <i>A. fumigatus</i> (78.7%), <i>A. flavus</i> (16.4%), <i>A. terreus</i> (3.3%) and <i>A. niger</i> (1.6%)                                                                                                | 59 patients VRC, 2 patients VRC/L-AMB                                                                                                                                                        |
| Paramythiotou et al [9]   | 179                                | 4                                                                    | 6                                                                      | <i>A. fumigatus</i> (patient 1), <i>A. flavus</i> (patient 2), <i>A. flavus</i> and <i>A. fumigatus</i> (patient 3), <i>A. fumigatus</i> and <i>A. terreus</i> (patient 4), <i>A. terreus</i> (patient 6) | 5 patients ISV, 1 patient Caspofungin/L-AMB                                                                                                                                                  |
| Vélez et al [10]          | 83                                 | 16                                                                   | 16                                                                     |                                                                                                                                                                                                           |                                                                                                                                                                                              |
| Fortarezza et al [11]     | 45                                 | 9                                                                    | 9                                                                      |                                                                                                                                                                                                           | /                                                                                                                                                                                            |
| Kula et al [12]           | 677                                | 8                                                                    | 8                                                                      |                                                                                                                                                                                                           | 1 patient L-AMB/ISV, many patients undocumented                                                                                                                                              |
| Wasylyshyn et al [13]     | 256                                | 2                                                                    | 3                                                                      | <i>A.fumigatus</i> in two patients                                                                                                                                                                        | 1 patient IV VRC (2 weeks) followed by combination of micafungin and L-AMB, 1 patient PO VRC/PO ISV daily                                                                                    |
| Ghazanfari et al [14]     | 105 <sup>2</sup>                   | 22                                                                   | 22                                                                     | <i>A. flavus</i> (63,6%), <i>A. fumigatus</i> and <i>A. japonicus</i> (13,6%) and <i>A. niger</i> (9,1%)                                                                                                  | /                                                                                                                                                                                            |
| Oliva et al [15]          | 55                                 | 2                                                                    | 2                                                                      | /                                                                                                                                                                                                         | No                                                                                                                                                                                           |
| Reizine et al [16]        | 49                                 | 4                                                                    | 10                                                                     |                                                                                                                                                                                                           | 8 patients VRC                                                                                                                                                                               |

|                            |                  |                 |                 |                                                                                   |                                                                                                                                                                         |
|----------------------------|------------------|-----------------|-----------------|-----------------------------------------------------------------------------------|-------------------------------------------------------------------------------------------------------------------------------------------------------------------------|
| Martín et al [17]          | 15               | 3               | 3               | <i>A. fumigatus</i>                                                               |                                                                                                                                                                         |
| Ripa et al [18]            | 86 <sup>3</sup>  | 10              | 10              |                                                                                   |                                                                                                                                                                         |
| Lahmer et al [19]          | 32               | 11              | 11              | <i>A. fumigatus</i> (81.8%) in all putative cases                                 | 5 patients VRC, 1 patient ISV and 5 patients L-AMB                                                                                                                      |
| Permpalung et al [20]      | 396              | 20              | 39              |                                                                                   |                                                                                                                                                                         |
| Van Grootveld et al [21]   | 63               | 11              | 11              | <i>A. fumigatus</i> (92%), <i>A. niger</i> (4%) en <i>A. flavus</i> (4%)          | 6 patients treated with antifungals                                                                                                                                     |
| Yusuf et al [22]           | 92               | 0 <sup>4</sup>  | 0 <sup>4</sup>  |                                                                                   |                                                                                                                                                                         |
| Versyck et al [23]         | 54               | 2               | 2               | <i>A. fumigatus</i>                                                               | 2/2 patients VRC                                                                                                                                                        |
| Meijer et al [24]          | 66               | 8               | 13              | <i>A. fumigatus</i>                                                               | 7 patients VRC, 5 patients empiric caspofungin/VRC/L-AMB, 1 patient L-AMB/VRC                                                                                           |
| Fekkar et al [25]          | 145              | 6               | 6               | <i>A. fumigatus</i>                                                               | 3 patient VRC and Caspofungin, 1 patient L-AMB and Caspofungin, 1 patient VRC/L-AMB/caspofungin/ISV, 1 patient VRC/caspofungin/L-AMB                                    |
| Maes et al [26]            | 81               | 3               | 3               |                                                                                   | 3 patients L-AMB                                                                                                                                                        |
| Marr et al [27]            | 20               | 20              | 20              | <i>A. fumigatus</i> (71%)                                                         | All but 2 patients were treated with antifungals including: VRC, POS, or L-AMB                                                                                          |
| Razazi et al [28]          | 90               | 13              | 13              |                                                                                   |                                                                                                                                                                         |
| Dellière et al [29]        | 366              | 21              | 21              |                                                                                   |                                                                                                                                                                         |
| Benedetti et al [30]       | 5                | 5               | 5               | <i>A. fumigatus</i> (60%)                                                         | 4 patients VRC, 1 patient L-AMB                                                                                                                                         |
| Nebreda-Mayoral et al [31] | 113              | 3               | 3               | <i>A. fumigatus</i> (66%) and <i>A. niger</i> (33%)                               |                                                                                                                                                                         |
| Segrelles-Calvo et al [32] | 215              | 7               | 7               | <i>A. fumigatus</i> (43%), <i>A. flavus</i> and <i>A. niger</i> (28%)             | 3 patients Itraconazole, 1 patient L-AMB                                                                                                                                |
| Machado et al [33]         | 239              | 8               | 8               | <i>A. fumigatus</i> (75%) <i>A. citrinoterreus</i> and <i>A. lentulus</i> (12,5%) | 4 patients ISV, 1 patient L-AMB                                                                                                                                         |
| Mitaka et al [34]          | 7                | 4               | 4               | <i>A. fumigatus</i>                                                               | 3 patients VRC, 1 patient Caspofungin                                                                                                                                   |
| White et al [35]           | 135              | 20 <sup>5</sup> | 20 <sup>5</sup> | <i>A. fumigatus</i>                                                               | 4 patients VRC, 1 patient L-AMB, 1 patient VRC/L-AMB, Anidulafungin/L-AMB                                                                                               |
| Dupont et al [36]          | 106              | 19              | 19              | <i>A. fumigatus</i> (87,5%) and <i>A. niger</i> and <i>A. calidoustus</i> (6,25%) | 8 patients VRC, 1 patient VRC + Caspofungin                                                                                                                             |
| Sarrazyn et al [37]        | 131              | 4               | 4               |                                                                                   | 1 patient VRC and 2 patients VRC followed by L-AMB                                                                                                                      |
| Falces-Romero et al [38]   | 10               | 8               | 8               | <i>A. fumigatus</i> (90%) and <i>A. nidulans</i> (10%)                            | 2 patients VRC, 1 patient VRC/Caspofungin, 1 patient L-AMB, 1 patient L-AMB/ISV, 1 patient L-AMB/VRC, 1 patient Micafungin/VRC/ISV/L-Amn, 1 patient L-AMB/Anidulafungin |
| Bartoletti et al [39]      | 108 <sup>6</sup> | 30              | 30              | <i>A. fumigatus</i> (79%) and <i>A. niger</i> (15,8%) and <i>A. flavus</i> (5,2%) | 13 patients VRC, 3 patients other antifungals                                                                                                                           |

|                        |                 |   |   |                                                                                   |                                                                                     |
|------------------------|-----------------|---|---|-----------------------------------------------------------------------------------|-------------------------------------------------------------------------------------|
| Nasir et al [40]       | 23              | 5 | 5 | <i>A. flavus</i> (54,5%), <i>A. niger</i> (27,3%) and <i>A. fumigatus</i> (18,2%) | 3 patients VRC, 2 patients L-AMB                                                    |
| Van Biesen, et al [41] | 42              | 9 | 9 | <i>A. fumigatus</i> (71%) and <i>A. flavus</i> and <i>A. terreus</i> (14,3%)      | 9 patients VRC/L-AMB                                                                |
| Gangneux et al [42]    | 45              | 9 | 9 | <i>A. fumigatus</i> (88,9%) and <i>A. niger</i> (11,1%)                           | 7 patients VRC or ISV                                                               |
| Lamoth et al [43]      | 118             | 3 | 3 | <i>A. fumigatus</i>                                                               | 3/3 patients VRC                                                                    |
| Van Arkel et al [44]   | 31              | 3 | 6 | <i>A. fumigatus</i>                                                               | 5 patients VRC/Anidulafungin and 1 patient L-AMB                                    |
| Wang et al [45]        | 26 <sup>1</sup> | 8 | 8 | <i>A. fumigatus</i>                                                               |                                                                                     |
| Rutsaert et al [46]    | 34              | 4 | 4 | <i>A. fumigatus</i> (83.3%) and <i>A. flavus</i> (16,7%)                          | 3 patients VRC, 1 patient VRC/ISV                                                   |
| Alanio et al [47]      | 27              | 8 | 8 | <i>A. fumigatus</i>                                                               | 1 patient VRC, 1 patient Caspofungin and 7 other (putative) patients no antifungals |
| Koehler et al [48]     | 19              | 5 | 5 | <i>A. fumigatus</i>                                                               | 2 patients VRC, 2 patients Caspofungin/VRC, 1 patient ISV                           |

Abbreviations: VRC = voriconazole; ISV = isavuconazole; POS = posaconazole; L-AMB = liposomal amphotericin B

Remarks: If information was not found, cell is left open. <sup>1</sup>Hatzl et al, Van Ackerbroeck et al and Wang et al: only patients who did not receive prophylaxis are included in this table. <sup>2</sup>Ghazanfari et al: only patients with mechanical ventilation for 4 days or longer were included. <sup>3</sup>Ripa et al: only ICU-admitted patients are mentioned in this table. <sup>4</sup>Yusuf et al: no CAPA diagnosis was given, but 10 of 92 ICU COVID-19 patients had positive tests for *Aspergillus* on lower respiratory tract samples. <sup>5</sup>White et al: 20 proven/putative CAPA patients is the number according to the IAPA criteria. <sup>6</sup>Bartoletti et al: total ICU population was 185, only the 108 patients with screening for aspergillosis were included in this study.

## References

1. Gangneux, J.P.; Dannaoui, E.; Fekkar, A.; Luyt, C.E.; Botterel, F.; de Prost, N.; Tadie, J.M.; Reizine, F.; Houze, S.; Timsit, J.-F.; et al. High Prevalence of Fungal Infections in Mechanically Ventilated COVID-19 Patients in the ICU: The French Multicenter MYCOVID Study. *SSRN Electron. J.* **2021**, doi:10.2139/ssrn.3858565.
2. Hatzl, S.; Reisinger, A.C.; Posch, F.; Prattes, J.; Stradner, M.; Pilz, S.; Eller, P.; Schoerghuber, M.; Toller, W.; Gorkiewicz, G.; et al. Antifungal prophylaxis for prevention of COVID-19-associated pulmonary aspergillosis in critically ill patients: an observational study. *Crit. Care* **2021**, 25, doi:10.1186/s13054-021-03753-9.
3. Janssen, N.A.F.; Nyga, R.; Vanderbeke, L.; Jacobs, C.; Ergün, M.; Buil, J.B.; Dijk, K. van; Altenburg, J.; Bouman, C.S.C.; Spoel, H.I. van der; et al. Multinational Observational Cohort Study of COVID-19–Associated Pulmonary Aspergillosis - Volume 27, Number 11—November 2021 - Emerging Infectious Diseases journal - CDC. *Emerg. Infect. Dis.* **2021**, 27, doi:10.3201/EID2711.211174.
4. Ergün, M.; Brüggemann, R.J.M.; Alanio, A.; Dellièvre, S.; van Arkel, A.; Bentvelsen, R.G.; Rijpstra, T.; van der Sar-van der Brugge, S.; Lagrou, K.; Janssen, N.A.F.; et al. Aspergillus test profiles and mortality in critically-ill COVID-19 patients. *J. Clin. Microbiol.* **2021**, doi:10.1128/jcm.01229-21.
5. Prattes, J.; Wauters, J.; Giacobbe, D.R.; Salmanton-García, J.; Maertens, J.; Bourgeois, M.; Reynders, M.; Rutsaert, L.; Van Regenmortel, N.; Lormans, P.; et al. Risk factors and outcome of pulmonary aspergillosis in critically ill coronavirus disease 2019 patients— a multinational observational study by the European Confederation of Medical Mycology. *Clin. Microbiol. Infect.* **2021**, doi:10.1016/j.cmi.2021.08.014.
6. Van Ackerbroeck, S.; Rutsaert, L.; Roelant, E.; Dillen, K.; Wauters, J.; Van Regenmortel, N. Inhaled liposomal amphotericin-B as a prophylactic treatment for COVID-19-associated pulmonary aspergillosis/aspergillus tracheobronchitis. *Crit. Care* 2021, 25.
7. Szabo, B.G.; Lakatos, B.; Bobek, I.; Szabo, E.; Szlavik, J.; Vályi-Nagy, I. Invasive fungal infections among critically ill adult COVID-19 patients: First experiences from the national centre in Hungary. *J. Med. Mycol.* **2021**, 31, doi:10.1016/j.mycmed.2021.101198.
8. Iqbal, A.; Ramzan, M.; Akhtar, A.; Ahtesham, A.; Aslam, S.; Khalid, J. COVID-Associated Pulmonary Aspergillosis and Its Related Outcomes: A Single-Center Prospective Observational Study. *Cureus* **2021**, 13, doi:10.7759/cureus.16982.
9. Paramythiotou, E.; Dimopoulos, G.; Koliakos, N.; Siopi, M.; Vourli, S.; Pournaras, S.; Meletiadis, J. Epidemiology and Incidence of COVID-19-Associated Pulmonary Aspergillosis (CAPA) in a Greek Tertiary Care Academic Reference Hospital. *Infect. Dis. Ther.* **2021**, 10, 1779–1792, doi:10.1007/s40121-021-00486-8.
10. Vélez Pintado, M.; Camiro-Zúñiga, A.; Aguilar Soto, M.; Cuenca, D.; Mercado, M.; Crabtree-Ramirez, B. COVID-19-associated invasive pulmonary aspergillosis in a tertiary care center in Mexico City. *Med. Mycol.* **2021**, 59, 828–833, doi:10.1093/mmy/myab009.
11. Fortarezza, F.; Boscolo, A.; Pezzuto, F.; Lunardi, F.; Acosta, M.J.; Giraudo, C.; Vecchio, C. Del; Sella, N.; Tiberio, I.; Godi, I.; et al. Proven COVID-19—associated pulmonary aspergillosis in patients with severe respiratory failure. *Mycoses* **2021**, 64, 1223–1229, doi:10.1111/MYC.13342.
12. Kula, B.E.; Clancy, C.J.; Hong Nguyen, M.; Schwartz, I.S. Invasive mould disease in fatal COVID-19: a systematic review of autopsies. *The Lancet Microbe* 2021, 2, e405–e414.
13. Wasylshyn, A.I.; Wasylshyn, G.R.; Linder, K.A.; Miceli, M.H. COVID-19-Associated Pulmonary Aspergillosis at an Academic Medical Center in the Midwestern United States. *Mycopathologia* **2021**, 186, 499–505, doi:10.1007/s11046-021-00564-y.
14. Ghazanfari, M.; Arastehfar, A.; Davoodi, L.; Yazdani Charati, J.; Moazeni, M.; Abastabar, M.; Haghani, I.; Mirzakhani, R.; Mayahi, S.; Fang, W.; et al. Pervasive but

Neglected: A Perspective on COVID-19-Associated Pulmonary Mold Infections Among Mechanically Ventilated COVID-19 Patients. *Front. Med.* **2021**, *8*, doi:10.3389/fmed.2021.649675.

15. Oliva, A.; Ceccarelli, G.; Borrazzo, C.; Ridolfi, M.; D'Ettore, G.; Alessandri, F.; Ruberto, F.; Pugliese, F.; Raponi, G.M.; Russo, A.; et al. Comparison of clinical features and outcomes in COVID-19 and influenza pneumonia patients requiring intensive care unit admission. *Infection* **2021**, *49*, 965–975, doi:10.1007/s15010-021-01624-7.
16. Reizine, F.; Pinceaux, K.; Lederlin, M.; Autier, B.; Guegan, H.; Gacouin, A.; Luque-Paz, D.; Boglione-Kerrien, C.; Bacle, A.; Le Daré, B.; et al. Influenza-and covid-19-associated pulmonary aspergillosis: Are the pictures different? *J. Fungi* **2021**, *7*, doi:10.3390/jof7050388.
17. Sánchez Martín, C.; Madrid Martínez, E.; González Pellicer, R.; Armero Ibáñez, R.; Martínez González, E.; Llau Pitarch, J. V. Invasive pulmonary aspergillosis in patients with acute respiratory syndrome by COVID-19. *Rev. Esp. Anesthesiol. Reanim.* **2021**, doi:10.1016/j.redar.2021.02.012.
18. Ripa, M.; Galli, L.; Poli, A.; Oltolini, C.; Spagnuolo, V.; Mastrangelo, A.; Muccini, C.; Monti, G.; De Luca, G.; Landoni, G.; et al. Secondary infections in patients hospitalized with COVID-19: incidence and predictive factors. *Clin. Microbiol. Infect.* **2021**, *27*, 451–457, doi:10.1016/j.cmi.2020.10.021.
19. Lahmer, T.; Kriescher, S.; Herner, A.; Rothe, K.; Spinner, C.D.; Schneider, J.; Mayer, U.; Neuenhahn, M.; Hoffmann, D.; Geisler, F.; et al. Invasive pulmonary aspergillosis in critically ill patients with severe COVID-19 pneumonia: Results from the prospective AspCOVID-19 study. *PLoS One* **2021**, *16*, doi:10.1371/journal.pone.0238825.
20. Permpalung, N.; Chiang, T.P.-Y.; Massie, A.B.; Zhang, S.X.; Avery, R.K.; Nematollahi, S.; Ostrander, D.; Segev, D.L.; Marr, K.A. Coronavirus Disease 2019–Associated Pulmonary Aspergillosis in Mechanically Ventilated Patients. *Clin. Infect. Dis.* **2021**, doi:10.1093/cid/ciab223.
21. van Grootveld, R.; van Paassen, J.; de Boer, M.G.J.; Claas, E.C.J.; Kuijper, E.J.; van der Beek, M.T. Systematic screening for COVID-19 associated invasive aspergillosis in ICU patients by culture and PCR on tracheal aspirate. *Mycoses* **2021**, *64*, 641–650, doi:10.1111/myc.13259.
22. Yusuf, E.; Vonk, A.; van den Akker, J.P.C.; Bode, L.; Sips, G.J.; Rijnders, B.J.A.; de Steenwinkel, J.; Verkaik, N.J.; Vogel, M.; van der Eerden, M.; et al. Frequency of positive aspergillus tests in COVID-19 patients in comparison to other patients with pulmonary infections admitted to the intensive care unit. *J. Clin. Microbiol.* **2021**, *59*, doi:10.1128/JCM.02278-20.
23. Versyck, M.; Zarrougui, W.; Lambiotte, F.; Elbeki, N.; Saint-Leger, P. Invasive pulmonary aspergillosis in COVID-19 critically ill patients: Results of a French monocentric cohort. *J. Mycol. Med.* **2021**, *31*, 101122, doi:10.1016/J.MYCMED.2021.101122.
24. Meijer, E.F.J.; Dofferhoff, A.S.M.; Hoiting, O.; Meis, J.F. COVID-19–associated pulmonary aspergillosis: a prospective single-center dual case series. *Mycoses* **2021**, *64*, 457–464, doi:10.1111/myc.13254.
25. Fekkar, A.; Lampros, A.; Mayaux, J.; Poignon, C.; Demeret, S.; Constantin, J.M.; Marcelin, A.G.; Monsel, A.; Luyt, C.E.; Blaize, M. Occurrence of invasive pulmonary fungal infections in patients with severe COVID-19 admitted to the ICU. *Am. J. Respir. Crit. Care Med.* **2021**, *203*, 307–317, doi:10.1164/rccm.202009-3400OC.
26. Maes, M.; Higginson, E.; Pereira-Dias, J.; Curran, M.D.; Parmar, S.; Khokhar, F.; Cuchet-Lourenço, D.; Lux, J.; Sharma-Hajela, S.; Ravenhill, B.; et al. Ventilator-associated pneumonia in critically ill patients with COVID-19. *Crit. Care* **2021**, *25*, doi:10.1186/s13054-021-03460-5.
27. Marr, K.A.; Platt, A.; Tornheim, J.A.; Zhang, S.X.; Datta, K.; Cardozo, C.; Garcia-Vidal, C. Aspergillosis complicating severe coronavirus disease. *Emerg. Infect. Dis.* **2021**, *27*, 18–25, doi:10.3201/eid2701.202896.

28. Razazi, K.; Arrestier, R.; Haudebourg, A.F.; Benelli, B.; Carteaux, G.; Decousser, J. -W; Fourati, S.; Woerther, P.L.; Schlemmer, F.; Charles-Nelson, A.; et al. Risks of ventilator-associated pneumonia and invasive pulmonary aspergillosis in patients with viral acute respiratory distress syndrome related or not to Coronavirus 19 disease. *Crit. Care* **2020**, *24*, doi:10.1186/s13054-020-03417-0.
29. Dellièvre, S.; Dudoignon, E.; Fodil, S.; Voicu, S.; Collet, M.; Oillac, P.A.; Salmona, M.; Dépret, F.; Ghelfenstein-Ferreira, T.; Plaud, B.; et al. Risk factors associated with COVID-19-associated pulmonary aspergillosis in ICU patients: a French multicentric retrospective cohort. *Clin. Microbiol. Infect.* **2021**, *27*, 790.e1-790.e5, doi:10.1016/j.cmi.2020.12.005.
30. Benedetti, M.F.; Alava, K.H.; Sagardia, J.; Cadena, R.C.; Laplume, D.; Capece, P.; Posse, G.; Nusblat, A.D.; Cuestas, M.L. COVID-19 associated pulmonary aspergillosis in ICU patients: Report of five cases from Argentina. *Med. Mycol. Case Rep.* **2021**, *31*, 24–28, doi:10.1016/j.mmcr.2020.11.003.
31. Nebreda-Mayoral, T.; Miguel-Gómez, M.A.; March-Rosselló, G.A.; Puente-Fuertes, L.; Cantón-Benito, E.; Martínez-García, A.M.; Muñoz-Martín, A.B.; Orduña-Domingo, A. Bacterial/fungal infection in hospitalized patients with COVID-19 in a tertiary hospital in the Community of Castilla y León, Spain. *Enferm. Infecc. Microbiol. Clin.* **2021**, doi:10.1016/j.eimc.2020.11.003.
32. Segrelles-Calvo, G.; Araújo, G.R.S.; Llopis-Pastor, E.; Carrillo, J.; Hernández-Hernández, M.; Rey, L.; Rodríguez Melean, N.; Escribano, I.; Antón, E.; Zamarro, C.; et al. Prevalence of opportunistic invasive aspergillosis in COVID-19 patients with severe pneumonia. *Mycoses* **2021**, *64*, 144–151, doi:10.1111/myc.13219.
33. Machado, M.; Valerio, M.; Álvarez-Uría, A.; Olmedo, M.; Veintimilla, C.; Padilla, B.; De la Villa, S.; Guinea, J.; Escribano, P.; Ruiz-Serrano, M.J.; et al. Invasive pulmonary aspergillosis in the COVID-19 era: An expected new entity. *Mycoses* **2021**, *64*, 132–143.
34. Mitaka, H.; Perlman, D.C.; Javaid, W.; Salomon, N. Putative invasive pulmonary aspergillosis in critically ill patients with COVID-19: An observational study from New York City. *Mycoses* **2020**, *63*, 1368–1372, doi:10.1111/myc.13185.
35. White, P.L.; Dhillon, R.; Cordey, A.; Hughes, H.; Faggian, F.; Soni, S.; Pandey, M.; Whitaker, H.; May, A.; Morgan, M.; et al. A National Strategy to Diagnose Coronavirus Disease 2019–Associated Invasive Fungal Disease in the Intensive Care Unit. *Clin. Infect. Dis.* **2021**, *73*, e1634–e1644, doi:10.1093/cid/ciaa1298.
36. Dupont, D.; Menotti, J.; Turc, J.; Miossec, C.; Wallet, F.; Richard, J.C.; Argaud, L.; Paulus, S.; Wallon, M.; Ader, F.; et al. Pulmonary aspergillosis in critically ill patients with Coronavirus Disease 2019 (Covid-19). *Med. Mycol.* **2021**, *59*, 110–114, doi:10.1093/mmy/myaa078.
37. Sarrazyn, C.; Dhaese, S.; Demey, B.; Vandecasteele, S.; Reynders, M.; Van Praet, J.T. Incidence, risk factors, timing, and outcome of influenza versus COVID-19-associated putative invasive aspergillosis. *Infect. Control Hosp. Epidemiol.* **2021**, *42*, 1149–1150.
38. Falces-Romero, I.; Ruiz-Bastián, M.; Díaz-Pollán, B.; Maseda, E.; García-Rodríguez, J.; Montero-Vega, M.D.; Romero-Gómez, M.P.; García-Bujalance, S.; Cendejas-Bueno, E.; Toro-Rueda, C.; et al. Isolation of *Aspergillus* spp. in respiratory samples of patients with COVID-19 in a Spanish Tertiary Care Hospital. *Mycoses* **2020**, *63*, 1144–1148, doi:10.1111/myc.13155.
39. Bartoletti, M.; Pascale, R.; Cricca, M.; Rinaldi, M.; Maccaro, A.; Bussini, L.; Fornaro, G.; Tonetti, T.; Pizzilli, G.; Francalanci, E.; et al. Epidemiology of Invasive Pulmonary Aspergillosis Among Intubated Patients With COVID-19: A Prospective Study. *Clin. Infect. Dis.* **2020**, doi:10.1093/cid/ciaa1065.
40. Nasir, N.; Farooqi, J.; Mahmood, S.F.; Jabeen, K. COVID-19-associated pulmonary aspergillosis (CAPA) in patients admitted with severe COVID-19 pneumonia: An observational study from Pakistan. *Mycoses* **2020**, *63*, 766–770, doi:10.1111/myc.13135.
41. Biesen, S. Van; Kwa, D.; Bosman, R.J.; Juffermans, N.P. Detection of Invasive Pulmonary Aspergillosis in COVID-19 with Nondirected BAL. *Am. J. Respir. Crit. Care Med.*

**2020**, 202, 1171, doi:10.1164/RCCM.202005-2018LE.

42. Gangneux, J.P.; Reizine, F.; Guegan, H.; Pinceaux, K.; Le Balch, P.; Prat, E.; Pelletier, R.; Belaz, S.; Le Souhaitier, M.; Le Tulzo, Y.; et al. Is the COVID-19 pandemic a good time to include aspergillus molecular detection to categorize aspergillosis in ICU patients? A monocentric experience. *J. Fungi* **2020**, 6, 1–12, doi:10.3390/jof6030105.
43. Lamothe, F.; Glampedakis, E.; Boillat-Blanco, N.; Oddo, M.; Pagani, J.L. Incidence of invasive pulmonary aspergillosis among critically ill COVID-19 patients. *Clin. Microbiol. Infect.* **2020**, 26, 1706–1708, doi:10.1016/J.CMI.2020.07.010.
44. van Arkel, A.L.E.; Rijpstra, T.A.; Belderbos, H.N.A.; van Wijngaarden, P.; Verweij, P.E.; Bentvelsen, R.G. COVID-19-associated pulmonary aspergillosis. *Am. J. Respir. Crit. Care Med.* 2020, 202, 132–135.
45. Wang, J.; Yang, Q.; Zhang, P.; Sheng, J.; Zhou, J.; Qu, T.; Qu, T. Clinical characteristics of invasive pulmonary aspergillosis in patients with COVID-19 in Zhejiang, China: A retrospective case series. *Crit. Care* **2020**, 24, doi:10.1186/s13054-020-03046-7.
46. Rutsaert, L.; Steinfert, N.; Van Hunsel, T.; Bomans, P.; Naesens, R.; Mertes, H.; Dits, H.; Van Regenmortel, N. COVID-19-associated invasive pulmonary aspergillosis. *Ann. Intensive Care* 2020, 10.
47. Alanio, A.; Dellièvre, S.; Fodil, S.; Bretagne, S.; Mégarbane, B. Prevalence of putative invasive pulmonary aspergillosis in critically ill patients with COVID-19. *Lancet Respir. Med.* 2020, 8, e48–e49.
48. Koehler, P.; Cornely, O.A.; Böttiger, B.W.; Dusse, F.; Eichenauer, D.A.; Fuchs, F.; Hallek, M.; Jung, N.; Klein, F.; Persigehl, T.; et al. COVID-19 associated pulmonary aspergillosis. *Mycoses* **2020**, 63, 528–534, doi:10.1111/myc.13096.
